# Supplementary material for: Reducing the number of load cases for fatigue damage assessment of offshore wind turbine support structures using a simple severity-based sampling method
Source: Copernicus journal article supplement (doi:10.5194/wes-3-805-2018), 2018-10-30
Supplement: Supplementary file 1 [file wes-3-805-2018-supplement.zip]

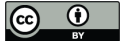

## *Supplement of*

# **Reducing the number of load cases for fatigue damage assessment of off-shore wind turbine support structures using a simple severity-based sampling method**

**Lars Einar S. Stieng and Michael Muskulus**

*Correspondence to:* Lars Einar S. Stieng ([lars.stieng@ntnu.no](mailto:lars.stieng@ntnu.no))

- wes-3-805-2018-supplement-title-page.pdf
- scripts\_and\_results\_for\_plotting\_rev\_stieng
  - fat\_dist.py
  - heatmap.py
  - k\_largest\_extended\_plots.py
  - k\_largest\_plots.py
  - partial\_sums.py
  - results\_for\_plotting
    - \* errors\_ml.txt
    - \* errors\_ml\_extended.txt
    - \* errors\_tb.txt
    - \* errors\_tb\_extended.txt
    - \* errors\_tt.txt
    - \* errors\_tt\_extended.txt
    - \* k\_largest\_est\_10percentless.txt
    - \* k\_largest\_est\_10percentmore.txt
    - \* k\_largest\_est\_10percentrnd.txt
    - \* k\_largest\_est\_5percentless.txt
    - \* k\_largest\_est\_5percentmore.txt
    - \* k\_largest\_est\_5percentrnd.txt
    - \* k\_largest\_est\_extended\_10percentless.txt
    - \* k\_largest\_est\_extended\_10percentmore.txt
    - \* k\_largest\_est\_extended\_10percentrnd.txt
    - \* k\_largest\_est\_extended\_5percentless.txt
    - \* k\_largest\_est\_extended\_5percentmore.txt

- \* k\_largest\_est\_extended\_5percentrnd.txt
- \* k\_largest\_est\_extended\_upto10percentrnd.txt
- \* k\_largest\_est\_upto10percentrnd.txt
- \* ml\_fatigue\_8points\_base\_model.txt
- \* tb\_fatigue\_8points\_base\_model.txt
- \* tt\_fatigue\_8points\_base\_model.txt
- union\_size.py

The copyright of individual parts of the supplement might differ from the CC BY 4.0 License.
